# Supplementary material for: The mechanisms underlying Li+/Mg2+ separation in ZIF-8 under an electric field from atomistic simulations
Source: Royal Society of Chemistry journal article supplement (doi:10.1039/d4cp02045f), 2024-01-01
Supplement: d4cp02045f2.pdf [file d4cp02045f2.pdf]

**Structure and dynamics of Li<sup>+</sup>/Mg<sup>2+</sup> confined in ZIF-8 under electric field from  
atomistic simulations**

Xiang-Long Fu, Fan Zheng, Shi-Jie Xie\*, Yan-Li Ji\*\*, Cong-Jie Gao

Center for Membrane Separation and Water Science & Technology, Zhejiang

University of Technology, Hangzhou 310014, PR China

\*email: [nanoxsj@yahoo.com](mailto:nanoxsj@yahoo.com)

\*\*email: [yanliji@zjut.edu.cn](mailto:yanliji@zjut.edu.cn)

## 1. Ion–oxygen radial distribution functions $g(r)$

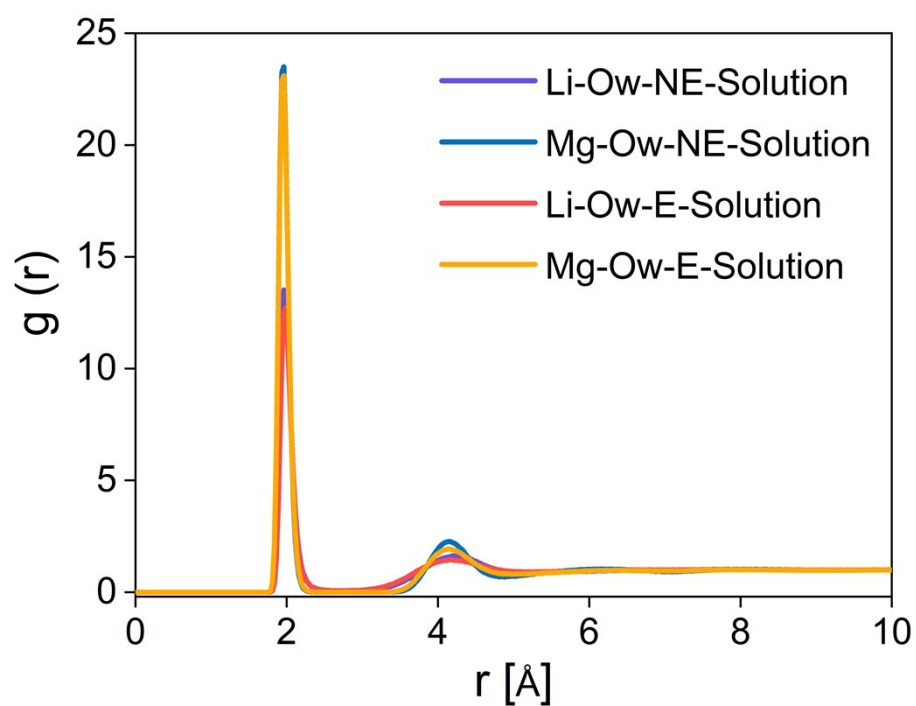

**Figure S1.** Ion–water oxygen radial distribution functions  $g(r)$  of  $\text{Li}^+$  and  $\text{Mg}^{2+}$  in aqueous solution. “E” and “NE” shown in legend indicate with and without external electric field, respectively.

## 2. Orientation angle distribution

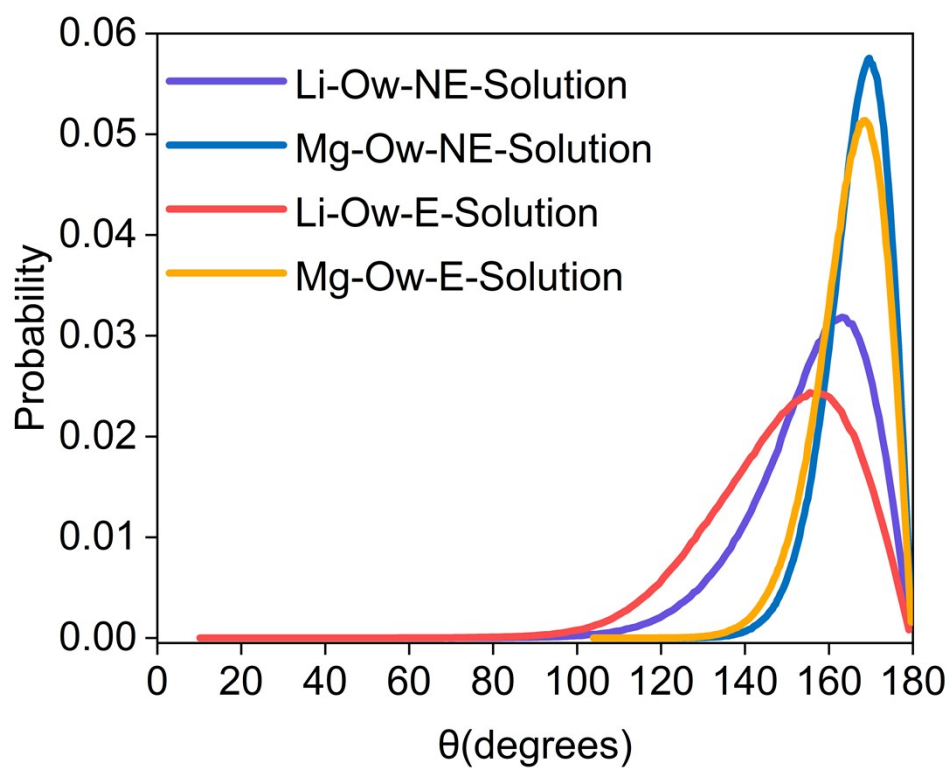

**Figure S2.** Probability distribution of water molecule orientation angle  $\theta$  in the radius of the first hydrate layer in aqueous solution under different electric field conditions.

### 3. Mean square displacement

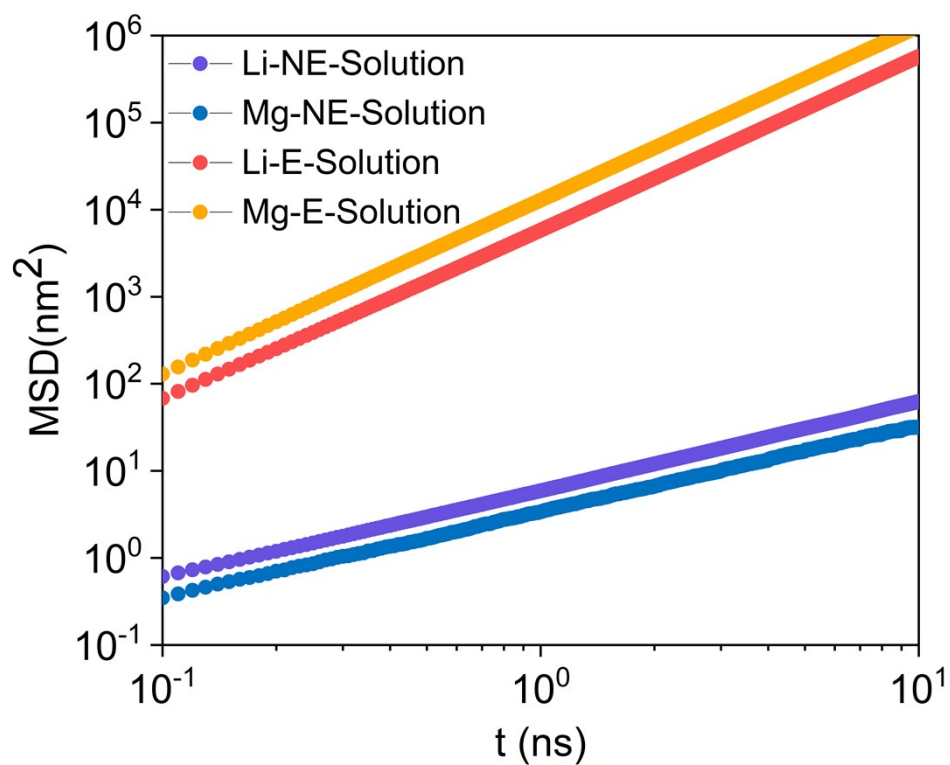

**Figure S3.** Mean square displacement (MSD) of Li<sup>+</sup>/Mg<sup>2+</sup> in aqueous solution with different electric field conditions.
